# Supplementary material for: Regional validation of the use of diatoms in ice cores from the Antarctic Peninsula as a Southern Hemisphere westerly wind proxy
Source: Copernicus journal article supplement (doi:10.5194/cp-18-1709-2022), 2022-07-21
Supplement: Supplementary file 1 [file cp-18-1709-2022-supplement.zip]

Archive with 5 entries (5 files):
- Supplementary material Figure S1.pdf
- Supplementary material Table S3.pdf
- cp-18-1709-2022-supplement-title-page.pdf
- Supplementary material Table S1.pdf
- Supplementary material Table S2.pdf
