# Supplementary material for: Regional validation of the use of diatoms in ice cores from the Antarctic Peninsula as a Southern Hemisphere westerly wind proxy
Source: Copernicus journal article supplement (doi:10.5194/cp-18-1709-2022), 2022-07-21
Supplement: Supplementary file 1 [file cp-18-1709-2022-supplement.zip › cp-18-1709-2022-supplement-title-page.pdf]

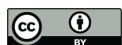

## *Supplement of*

# **Regional validation of the use of diatoms in ice cores from the Antarctic Peninsula as a Southern Hemisphere westerly wind proxy**

**Dieter R. Tetzner et al.**

*Correspondence to:* Dieter R. Tetzner ([dietet95@bas.ac.uk](mailto:dietet95@bas.ac.uk))

- [cp-18-1709-2022-supplement-title-page.pdf](#)
- [Supplementary material Figure S1.pdf](#)
- [Supplementary material Table S1.pdf](#)
- [Supplementary material Table S2.pdf](#)
- [Supplementary material Table S3.pdf](#)

The copyright of individual parts of the supplement might differ from the article licence.
