# Supplementary material for: Regional validation of the use of diatoms in ice cores from the Antarctic Peninsula as a Southern Hemisphere westerly wind proxy
Source: Copernicus journal article supplement (doi:10.5194/cp-18-1709-2022), 2022-07-21
Supplement: Supplementary file 1 [file cp-18-1709-2022-supplement.zip › Supplementary material Figure S1.pdf]

## Supplementary material

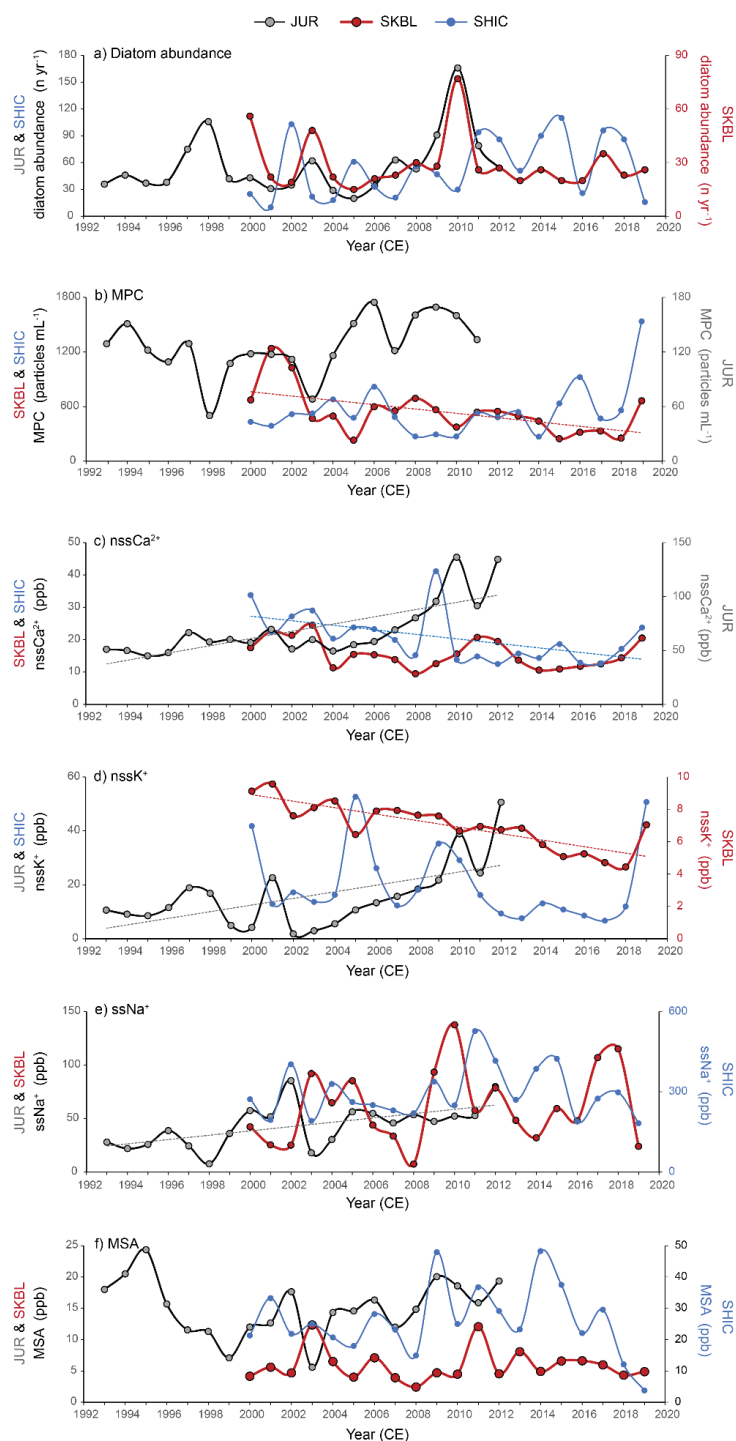

**Figure S1. Time series of chemical species concentration, MPC and diatom abundance for each ice core site. Data points represent the annual austral winter-to-winter average and were plotted over the correspondent austral summer. Colour-coded dashed lines show statistically significant linear trends ( $p < 0.05$ ). MPC record from JUR covers the interval 1992-2011 CE.**
