# Supplementary material for: Regional validation of the use of diatoms in ice cores from the Antarctic Peninsula as a Southern Hemisphere westerly wind proxy
Source: Copernicus journal article supplement (doi:10.5194/cp-18-1709-2022), 2022-07-21
Supplement: Supplementary file 1 [file cp-18-1709-2022-supplement.zip › Supplementary material Table S1.pdf]

## Supplementary Material

**Table S1.** Basic statistics for the diatom abundance ( $\text{n yr}^{-1}$ ), chemical species flux ( $\text{ppb kg m}^{-2}$ ) and MPC flux (particles  $\text{kg m}^{-2}$ ) annual records from each ice core. Bold numbers indicate statistically significant linear trend values ( $p < 0.05$ ). (\*) MPC flux record from JUR covers the interval 1992-2011 CE due to missing data.

|                                | Mean    | Stdv    | Max     | Min     | Linear trend   |
|--------------------------------|---------|---------|---------|---------|----------------|
| <b>SHIC (1999-2019 CE)</b>     |         |         |         |         |                |
| <b>Diatom abundance</b>        | 54.4    | 33.7    | 110     | 10      | 2.16           |
| <b>MPC flux</b>                | 401545  | 207293  | 893535  | 130601  | 7082.97        |
| <b>nssCa<sup>2+</sup> flux</b> | 14898.6 | 6010.57 | 24697.7 | 6623.69 | <b>-622.03</b> |
| <b>nssK<sup>+</sup> flux</b>   | 14316.9 | 10140.8 | 46777.8 | 4018.41 | -631.52        |
| <b>ssNa<sup>+</sup> flux</b>   | 212145  | 74777.1 | 393636  | 73544.5 | 895.62         |
| <b>MSA flux</b>                | 19383.7 | 9445.86 | 40421.8 | 1514.84 | -88.773        |
| <b>JUR (1992-2012 CE)</b>      |         |         |         |         |                |
| <b>Diatom abundance</b>        | 57.0    | 34.0    | 166     | 20      | 2.07           |
| <b>MPC flux*</b>               | 133330  | 45863.3 | 237952  | 54783.6 | 2030.22        |
| <b>nssCa<sup>2+</sup> flux</b> | 69827.9 | 21715.5 | 115976  | 34397.1 | <b>2568.96</b> |
| <b>nssK<sup>+</sup> flux</b>   | 14793.1 | 9887.22 | 40259.7 | 2203.81 | <b>1004.18</b> |
| <b>ssNa<sup>+</sup> flux</b>   | 46239.9 | 24722.7 | 110866  | 10750.2 | 1319.76        |
| <b>MSA flux</b>                | 15543.5 | 5605.27 | 23917.6 | 5058.6  | -56.01         |
| <b>SKBL (1999-2019 CE)</b>     |         |         |         |         |                |
| <b>Diatom abundance</b>        | 29.2    | 14.9    | 77      | 15      | -0.41          |
| <b>MPC flux</b>                | 261143  | 161326  | 681947  | 52610   | <b>-16574</b>  |
| <b>nssCa<sup>2+</sup> flux</b> | 7662.33 | 3787.26 | 17710.2 | 2985.67 | <b>-315.85</b> |
| <b>nssK<sup>+</sup> flux</b>   | 3377.75 | 1317.43 | 5857    | 921.31  | <b>-155.21</b> |
| <b>ssNa<sup>+</sup> flux</b>   | 28285   | 17079   | 66427   | 2355.27 | -234.93        |
| <b>MSA flux</b>                | 2927.59 | 1896.43 | 8919.92 | 773.1   | -58.28         |
