# Supplementary material for: Regional validation of the use of diatoms in ice cores from the Antarctic Peninsula as a Southern Hemisphere westerly wind proxy
Source: Copernicus journal article supplement (doi:10.5194/cp-18-1709-2022), 2022-07-21
Supplement: Supplementary file 1 [file cp-18-1709-2022-supplement.zip › Supplementary material Table S2.pdf]

## Supplementary material

**Table S2. Basic statistics for the diatom abundance (n yr<sup>-1</sup>), chemical species (ppb) and MPC (particles mL<sup>-1</sup>) annual records from each ice core. Bold numbers indicate statistically significant linear trend values (p<0.05). (\*) MPC record from JUR covers the interval 1992-2011 CE due to missing data.**

|                            | Mean   | Stdv   | Max     | Min    | Linear trend  |
|----------------------------|--------|--------|---------|--------|---------------|
| <b>SHIC (1999-2019 CE)</b> |        |        |         |        |               |
| <b>Diatom abundance</b>    | 54.4   | 33.7   | 110     | 10     | 2.16          |
| <b>MPC</b>                 | 554.80 | 287.44 | 1536.12 | 269.04 | 18.63         |
| <b>nssCa<sup>2+</sup></b>  | 20.62  | 7.67   | 41.17   | 12.51  | <b>-0.7</b>   |
| <b>nssK<sup>+</sup></b>    | 20.56  | 14.13  | 52.65   | 6.71   | -0.48         |
| <b>ssNa<sup>+</sup></b>    | 295.38 | 94.38  | 526.82  | 182.34 | 1.61          |
| <b>MSA</b>                 | 26.09  | 10.96  | 48.3    | 3.76   | -0.09         |
| <b>JUR (1992-2012 CE)</b>  |        |        |         |        |               |
| <b>Diatom abundance</b>    | 57.0   | 34.0   | 166     | 20     | 2.07          |
| <b>MPC*</b>                | 126.33 | 31.72  | 174.55  | 50.16  | 2.26          |
| <b>nssCa<sup>2+</sup></b>  | 69.41  | 26.45  | 136.46  | 45.08  | <b>3.35</b>   |
| <b>nssK<sup>+</sup></b>    | 15.6   | 12.16  | 50.62   | 1.83   | <b>1.23</b>   |
| <b>ssNa<sup>+</sup></b>    | 43.30  | 19.84  | 85.36   | 7.64   | <b>2.01</b>   |
| <b>MSA</b>                 | 15.12  | 4.56   | 24.36   | 5.58   | 0.02          |
| <b>SKBL (1999-2019 CE)</b> |        |        |         |        |               |
| <b>Diatom abundance</b>    | 29.2   | 14.9   | 77      | 15     | -0.41         |
| <b>MPC</b>                 | 537.60 | 250.19 | 1239.19 | 230.46 | <b>-23.74</b> |
| <b>nssCa<sup>2+</sup></b>  | 15.71  | 4.43   | 24.52   | 9.48   | -0.28         |
| <b>nssK<sup>+</sup></b>    | 7.00   | 1.41   | 9.57    | 4.44   | <b>-0.2</b>   |
| <b>ssNa<sup>+</sup></b>    | 61.04  | 34.94  | 137.62  | 7.44   | 1.31          |
| <b>MSA</b>                 | 5.91   | 2.52   | 12.35   | 2.44   | -0.01         |
